# Supplementary material for: Antibacterial Activity of Selected Essential Oils against Foodborne Pathogens and Their Application in Fresh Turkey Sausages
Source: MDPI journal article supplement (doi:10.3390/antibiotics12010182), 2023-01-16
Supplement: s1 [file s1]

a)

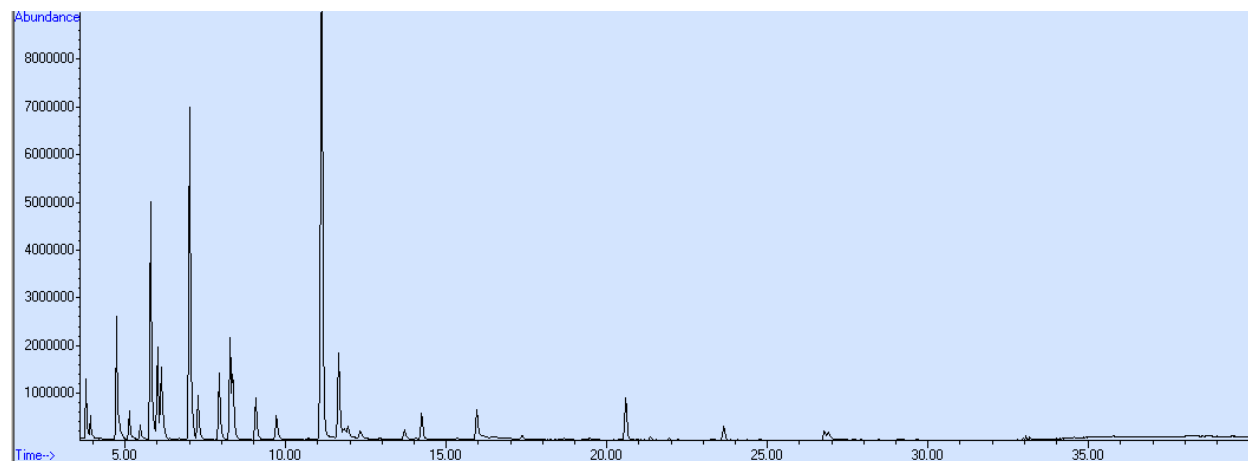

b)

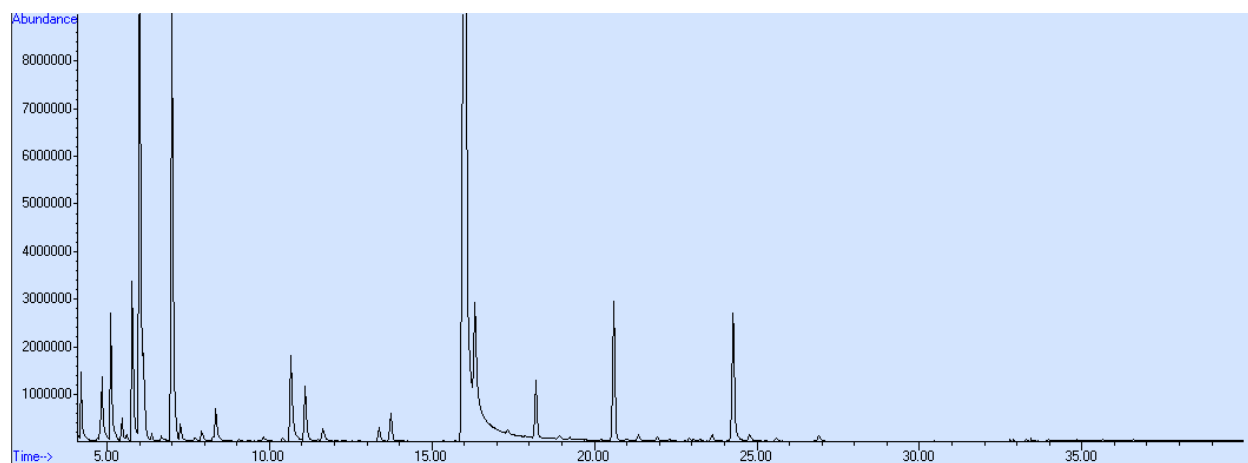

c)

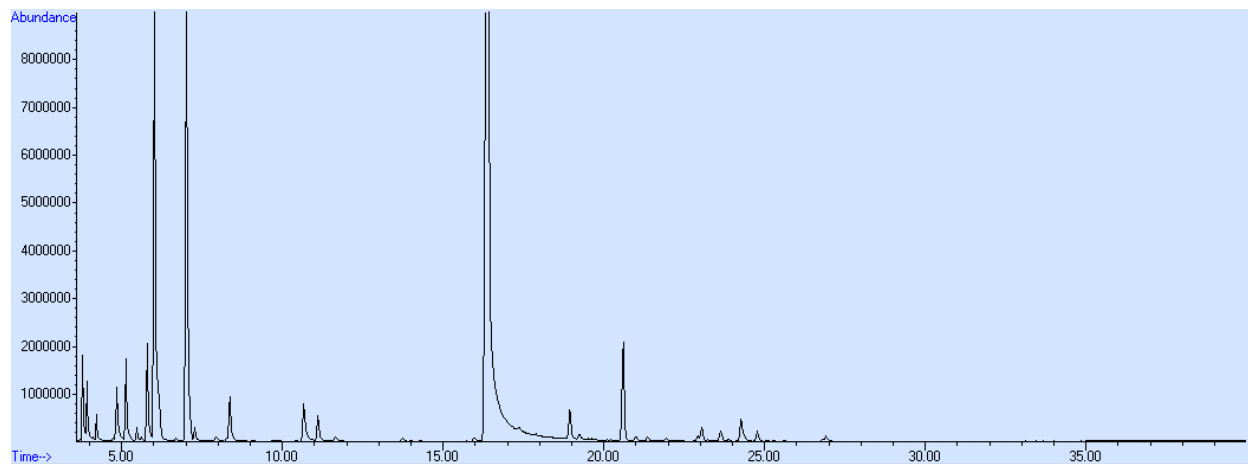

Figure S1. GC-MS Total ion chromatograms of a) *Origanum majorana*; b) *Satureja hortensis* c) *Satureja montana* essential oils
